# Supplementary material
Source: PubMed Central journal article supplement (PMC2474540)
Supplement: 0800952105_0800952105SI.pdf [file 0800952105_0800952105SI.pdf]

# Supporting Information

Ma et al. 10.1073/pnas.0800952105

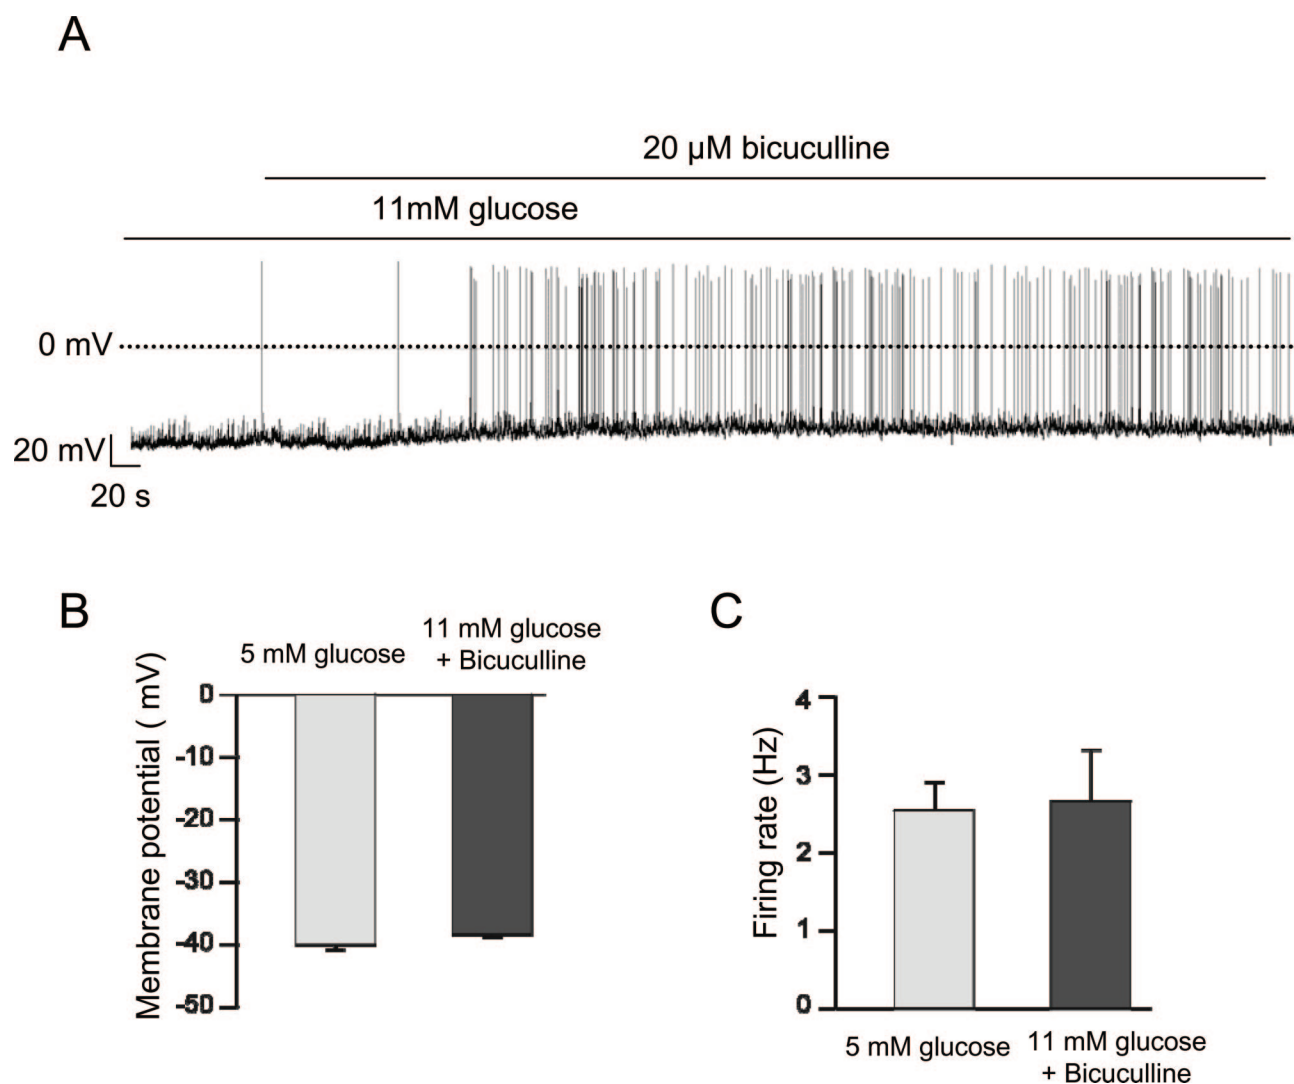

**Fig. S1.** Effects of bicuculline on the electrical activity of POMC neurons. (A) Representative recordings of electrical activity from an identified POMC neuron. Experiments were performed at 11 mM glucose and bicuculline (20  $\mu$ M) was applied as indicated on the bars. (B and C) Mean ( $\pm$  SEM) membrane potential (B) or action potential frequency (C) in the presence of 5 mM glucose (Left;  $n = 31$  cells) or 11 mM glucose + 20  $\mu$ M bicuculline (Right;  $n = 10$  cells).

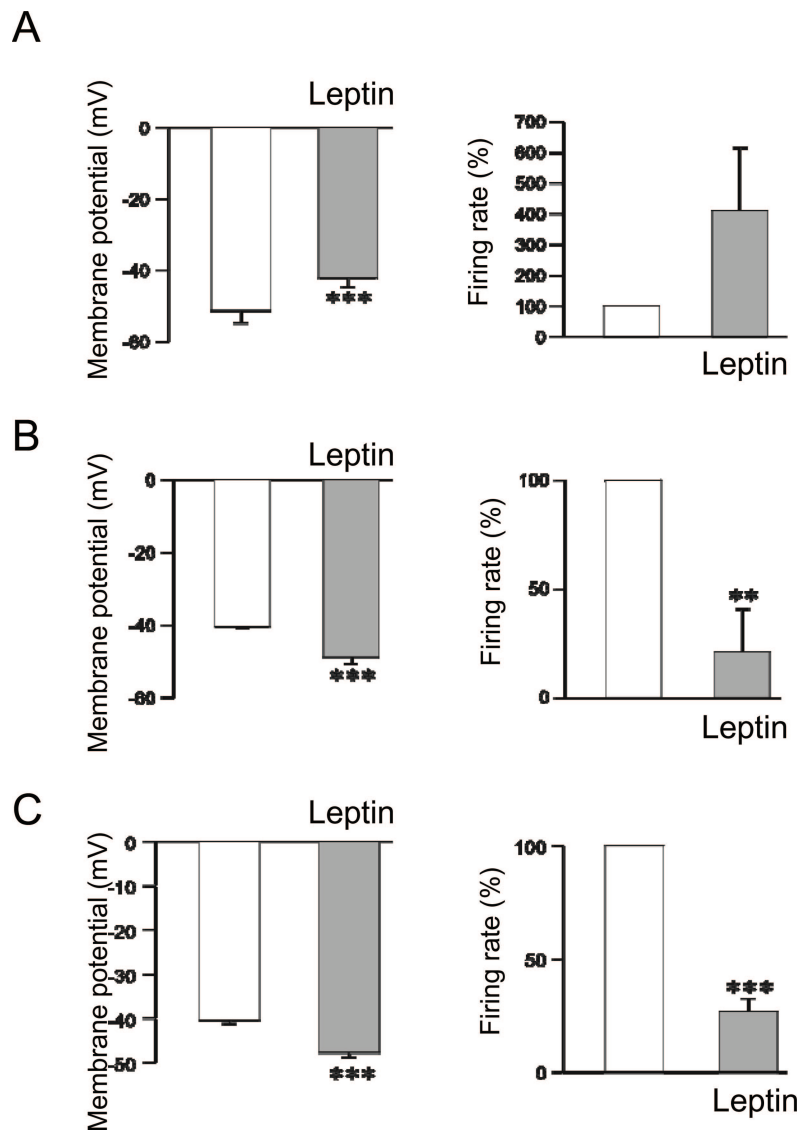

**Fig. S2.** Effects of leptin on the electrical activity of POMC neurons at different glucose concentrations. Mean ( $\pm$  SEM) membrane potential (*Left*) or changes in action potential frequency (*Right*) before and 10 min after addition of 100 nM leptin. (A) 11 mM glucose, 32°C,  $n = 9$  cells. (B) 5 mM glucose, 32°C,  $n = 5$  cells. (C) 5 mM glucose, 22°C,  $n = 26$  cells. \*\*,  $P < 0.01$ ; \*\*\*,  $P < 0.001$ , versus before the addition of leptin.





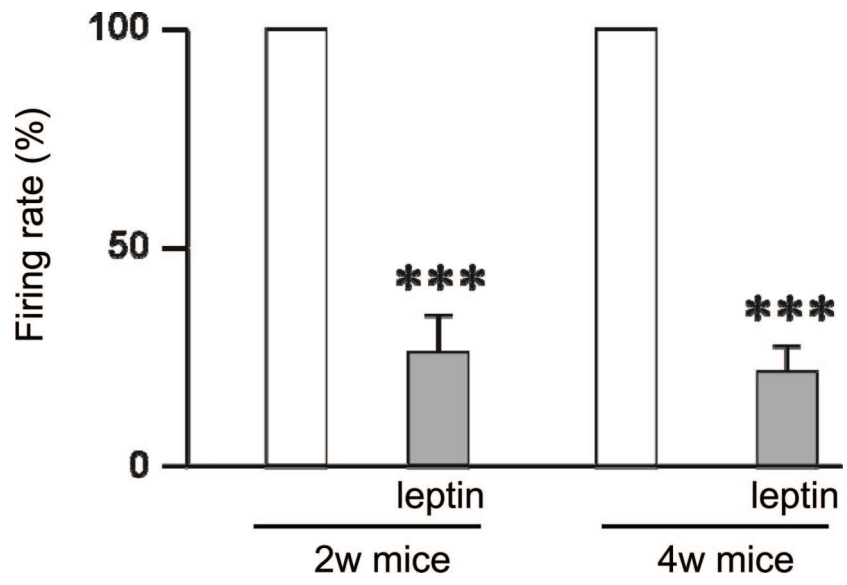

**Fig. S5.** Effect of leptin on the firing rate of POMC neurons in 2- and 4-week mice. Mean firing rate measured from the same identified POMC neuron first in control solution (white bar) and then 10 min after addition of 100 nM leptin (gray bar) for 2-week-old ( $n = 9$  cells) and 4-week-old ( $n = 17$  cells) mice. Data are expressed relative to the firing rate in control solution. \*\*\*,  $P < 0.01$  versus control.

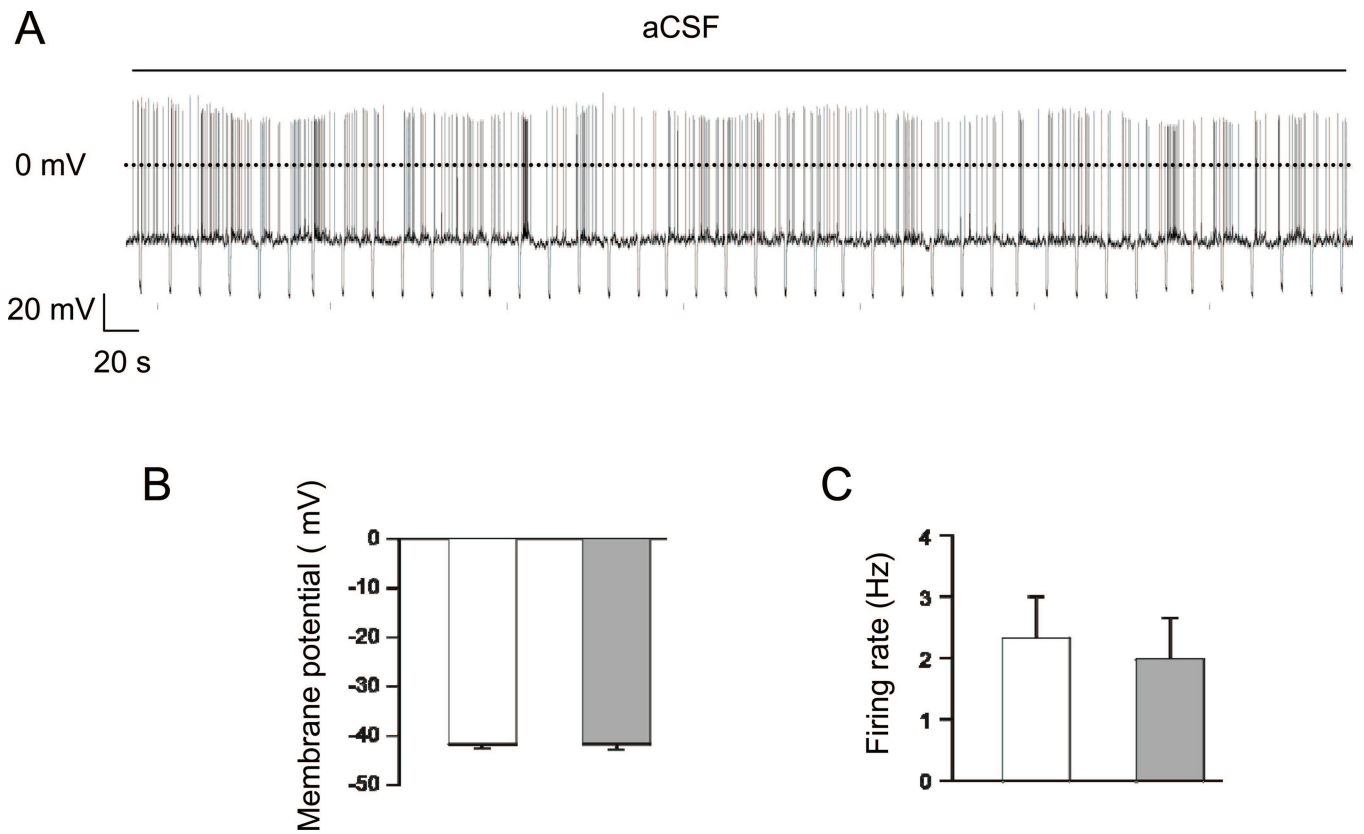

**Fig. 56.** Electrical activity of POMC neurons recorded in aCSF solution. (A) Representative recordings of electrical activity from identified POMC neurons. Downward voltage deflections are caused by periodic injections of hyperpolarizing current, which were applied to monitor membrane resistance. Recordings were made in the continued presence of aCSF. (B and C) Mean ( $\pm$  SEM) membrane potential (B) or action potential frequency (C) before and 10 min after continued perfusion of aCSF ( $n = 11$  cells).



**Table S1. PSCs at 11 and 5 mM glucose**

| Parameters | 5 mM glucose                           | 11 mM glucose                          |
|------------|----------------------------------------|----------------------------------------|
| EPSCs, Hz  | 3.58 ± 0.39 (2.50~4.75; <i>n</i> = 6)* | 2.33 ± 0.33 (0.69~3.63; <i>n</i> = 10) |
| IPSCs, Hz  | 2.53 ± 0.52 (0.85~3.98; <i>n</i> = 6)  | 2.94 ± 0.56 (1.76~5.51; <i>n</i> = 10) |
| Size, pF   | 10.35 ± 0.73 ( <i>n</i> = 6)           | 11.71 ± 0.87 ( <i>n</i> = 10)          |

\*, *P* = 0.014 versus IPSCs (paired *t* test).



**Table S2. Leptin transiently stimulates 9/26 POMC neurons over 2 min at 5 mM glucose**

| Parameters                     | Control                     | Leptin                      |
|--------------------------------|-----------------------------|-----------------------------|
| Resting potential, mV          | $-39 \pm 1$ ( $n = 9$ )     | $-37 \pm 1$ ( $n = 9$ )*    |
| Firing frequency, Hz           | $2.13 \pm 0.67$ ( $n = 9$ ) | $2.31 \pm 0.76$ ( $n = 9$ ) |
| Membrane resistance, $G\Omega$ | $1.44 \pm 0.16$ ( $n = 9$ ) | $1.36 \pm 0.11$ ( $n = 9$ ) |
| Capacitance, pF                | $12 \pm 1$ ( $n = 9$ )      | $12 \pm 1$ ( $n = 9$ )      |

Parameters were measured from the same neuron first in control solution (ACSF), then 2 min after addition of 100 nM leptin.

\*,  $P < 0.05$  versus before leptin (paired  $t$  test)

**Table S3. Leptin stimulates 4/31 POMC neurons at 5 mM glucose**

| Parameters                     | Control                     | Leptin                      |
|--------------------------------|-----------------------------|-----------------------------|
| Resting potential, mV          | $-38 \pm 3$ ( $n = 4$ )     | $-35 \pm 2$ ( $n = 4$ )*    |
| Firing frequency, Hz           | $2.9 \pm 1.2$ ( $n = 4$ )   | $3.9 \pm 1.5$ ( $n = 4$ )   |
| Membrane resistance, $G\Omega$ | $1.68 \pm 0.24$ ( $n = 4$ ) | $1.83 \pm 0.29$ ( $n = 4$ ) |
| Capacitance, pF                | $13 \pm 2$ ( $n = 4$ )      | $13 \pm 2$ ( $n = 4$ )      |

Parameters were measured from the same neurone first in control solution (ACSF), then 10 min after addition of 100 nM leptin.

\*,  $P < 0.05$  versus before leptin (paired  $t$  test).

**Table S4. Whole-cell  $K_{ATP}$  conductance in the absence and presence of leptin**

| Parameters                                       | Control                 | Leptin                  |
|--------------------------------------------------|-------------------------|-------------------------|
| Membrane conductance, pS/pF (before tolbutamide) | $75 \pm 24$ ( $n = 4$ ) | $73 \pm 13$ ( $n = 9$ ) |
| Membrane conductance, pS/pF (after tolbutamide)  | $55 \pm 25$ ( $n = 4$ ) | $48 \pm 10$ ( $n = 9$ ) |
| $K_{ATP}$ conductance, pS/pF                     | $20 \pm 5$ ( $n = 4$ )  | $25 \pm 6$ ( $n = 9$ )  |
| Non- $K_{ATP}$ conductance, pS/pF                | $55 \pm 25$ ( $n = 4$ ) | $48 \pm 10$ ( $n = 9$ ) |

No significant differences in all the parameters between leptin and control.
